# Supplementary material for: Multilayered Composites with Carbon Nanotubes for Electromagnetic Shielding Application
Source: MDPI journal article supplement (doi:10.3390/polym15041053), 2023-02-20
Supplement: s1 [file s1]

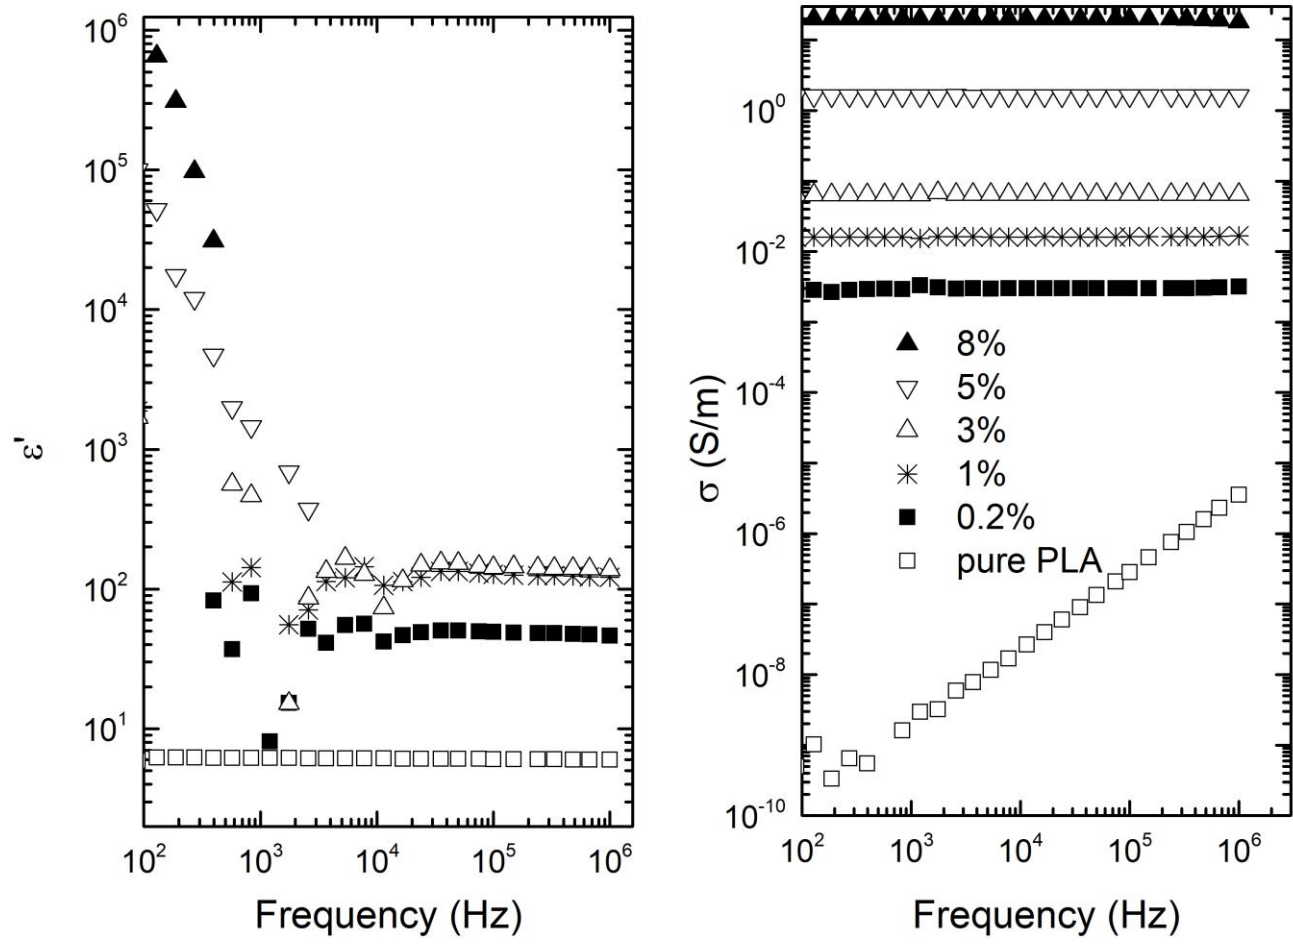

**Figure S1.** The measured dielectric permittivity (left) and electrical conductivity (right) in a 20 Hz - 1 MHz frequency range of CNT/PLA composites.
